# Supplementary material
Source: PubMed Central journal article supplement (PMC6810633)
Supplement: NIHMS1048104-supplement-Supplemental.pdf [file NIHMS1048104-supplement-Supplemental.pdf]

**Supplementary Figure S1. PRISMA flow-chart**

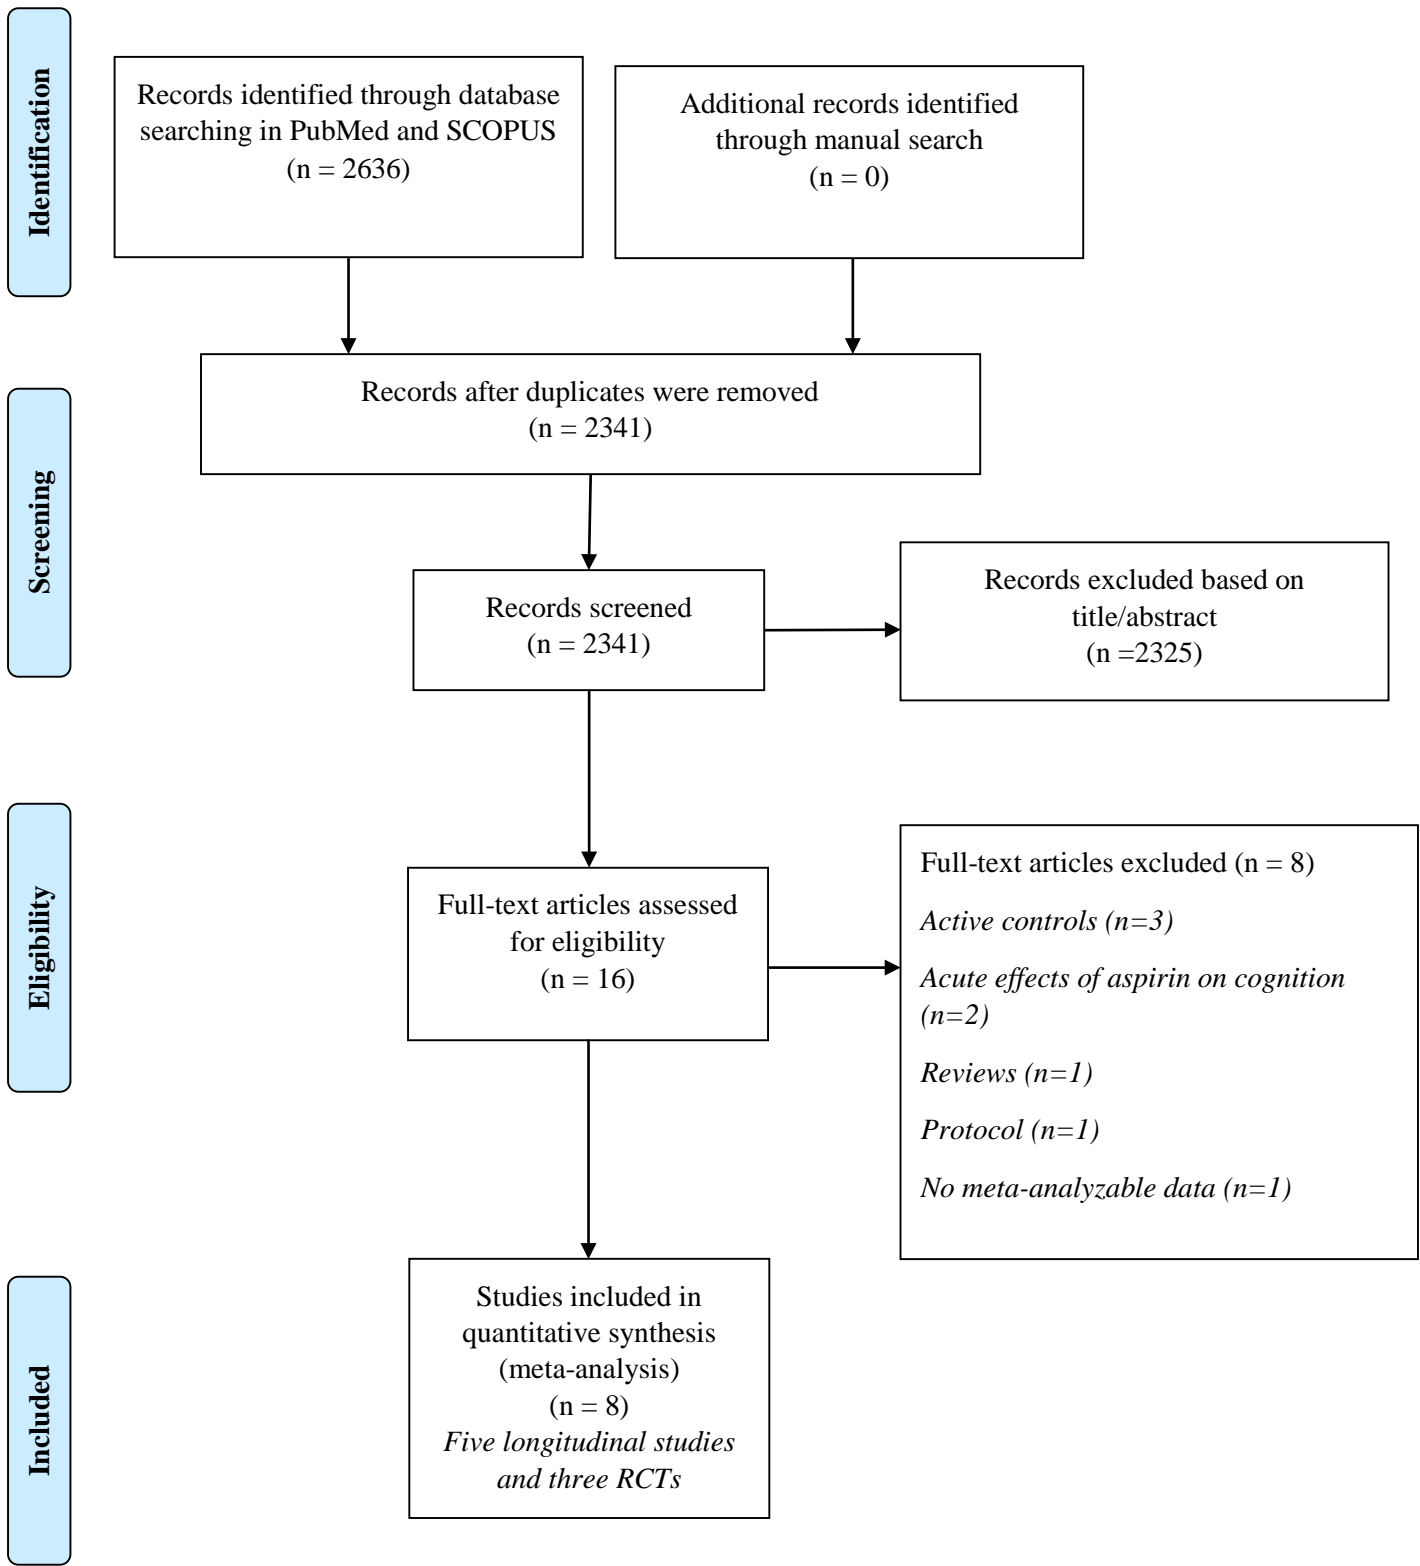

**Supplementary Table S1. Descriptive characteristics of the longitudinal studies included.**

| Author, year               | Country         | Setting                          | N of participants at the baseline | Mean age (SD)     | Percentage of females | Follow-up duration (years)    | Diagnostic criteria                                                                | Dosage/daily of aspirin (mg) | Covariates                                                                                             | Quality (Newcastle-Ottawa scale) |
|----------------------------|-----------------|----------------------------------|-----------------------------------|-------------------|-----------------------|-------------------------------|------------------------------------------------------------------------------------|------------------------------|--------------------------------------------------------------------------------------------------------|----------------------------------|
| Jonker et al., 2003        | The Netherlands | Community                        | 612                               | 73 (6.6)          | 51                    | 3                             | Cognitive impairment (Edwards-Nunnally method for three cognitive tests)           | 100 mg or less               | Age, gender, education, baseline MMSE score, diabetes mellitus, rheumatoid arthritis, vascular disease | 6                                |
| Kern et al., 2012          | Sweden          | Community                        | 789                               | 75 (5.2)          | 100                   | 5                             | Dementia (DSM-III-R)                                                               | 75-160 mg                    | None                                                                                                   | 6                                |
| Nilsson et al., 2003       | Sweden          | Community                        | 702                               | 83.9 (3.1)        | 58                    | 9                             | Dementia (DSM-III and NINCS-ARDRA (for AD) or NINDS-AIREN (for vascular dementia)) | 75                           | Age, gender, cerebrovascular disease                                                                   | 7                                |
| Kelley et al., 2015        | USA             | Community                        | 23915                             | 64 (9.2)          | 43                    | 5.9                           | Cognitive impairment (Six-item screener<5)                                         | Not reported                 | Age, sex, race, education, income, region                                                              | 7                                |
| Williams-Gray et al., 2014 | United Kingdom  | Community                        | 141                               | 70.1 (10.2)       | 42                    | 10                            | Dementia (DSM-IV with a MMSE $\leq$ 24/30)                                         | 75                           | None                                                                                                   | 6                                |
| <b>Total</b>               |                 | <b>Five studies in community</b> | <b>26,159</b>                     | <b>65.1 (8.9)</b> | <b>59</b>             | <b>Median=6 (range: 3-10)</b> | <b>3 studies: dementia; 2: cognitive impairment</b>                                |                              | <b>Median=3 (range: 0-7)</b>                                                                           | <b>Median=6 (range: 6-7)</b>     |

**Abbreviations:** DSM: Diagnostic and Statistical Manual of Mental Disorders; NINCS-ARDRA: National Institute of Neurologic, Communicative Disorders and Stroke-Alzheimer's Disease and Related Disorders Association; NINDS-AIREN: National Institute of Neurological Disorders and Stroke-Association Internationale pour la Recherche et l'Enseignement en Neurosciences; MMSE: Mini-Mental State Examination; SD: standard deviation.

**Supplementary Table S2. Descriptive characteristics of the randomized controlled trials included.**

| Author, year                     | Country        | Setting                     | N of participants (total) | Mean age (SD)     | Percentage of females | Follow-up duration (years)     | Tests for cognitive status                                                                               | Dosage/daily (mg) | Quality (Jadad's score)      |
|----------------------------------|----------------|-----------------------------|---------------------------|-------------------|-----------------------|--------------------------------|----------------------------------------------------------------------------------------------------------|-------------------|------------------------------|
| AD2000 collaborative group, 2000 | United Kingdom | Community                   | 310                       | 75 (2.5)          | 37                    | 3                              | MMSE                                                                                                     | 75                | 4                            |
| Kang et al., 2007                | USA            | Community                   | 6,377                     | 66.3 (4.1)        | 100                   | 9.6                            | Global score, verbal memory score, TICS test, category fluency                                           | 100               | 5                            |
| Price et al., 2008               | United Kingdom | Community                   | 3,350                     | 62 (7)            | 71.5                  | 5                              | Raven's progressive matrices, auditory verbal learning, digit symbol, verbal fluency, trail making, MMSE | 100               | 5                            |
| <b>Total</b>                     |                | <b>3 studies: community</b> | <b>10,037</b>             | <b>66.8 (7.1)</b> | <b>74</b>             | <b>Median=5 (range: 3-9.6)</b> |                                                                                                          |                   | <b>Median=5 (range: 4-5)</b> |

**Abbreviations:** MMSE: Mini-Mental State Examination; SD: standard deviation; TICS: Telephone Interview for Cognitive Status.
